# Supplementary material for: TerrSysMP–PDAF (version 1.0): a modular high-performance data assimilation framework for an integrated land surface–subsurface model
Source: Copernicus journal article supplement (doi:10.5194/gmd-9-1341-2016), 2016-04-11
Supplement: Supplementary file 2 [file gmd-9-1341-2016-supplement.zip]

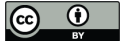

## *Supplement of*

# **TerrSysMP–PDAF (version 1.0): a modular high-performance data assimilation framework for an integrated land surface–subsurface model**

**Wolfgang Kurtz et al.**

*Correspondence to:* Wolfgang Kurtz (w.kurtz@fz-juelich.de)

- gmd-9-1341-2016-supplement-title-page.pdf
- tsmg-pdaf
  - COPYING
  - README
  - bin
    - \* .gitkeep
  - install
    - \* amps\_parflow\_stand\_alone
    - \* build\_pdaf\_model.sh
    - \* configure\_machine\_pdaf\_with\_terrsysmp.sh
    - \* modify\_build\_oas3.sh
    - \* modify\_clm\_src.sh
    - \* modify\_oas\_src.sh
    - \* modify\_pfl\_src.sh
    - \* patch\_clm\_param
  - libs
    - \* .gitkeep
  - man
    - \* manual\_tsmg-pdaf\_v1.0.pdf
  - src
    - \* framework
    - \* model

The copyright of individual parts of the supplement might differ from the CC-BY 3.0 licence.
